# Supplementary material for: MicroRNAs regulating superoxide dismutase 2 are new circulating biomarkers of heart failure
Source: PubMed Central journal article supplement (PMC5676691; doi:10.1038/s41598-017-15011-6), 2017-11-07
Supplement: 41598_2017_15011_MOESM1_ESM.pdf [file 41598_2017_15011_MOESM1_ESM.pdf]

**MicroRNAs regulating superoxide dismutase 2 are new circulating biomarkers of heart failure**

**Running title: *MicroRNAs targeting SOD2 as new biomarkers of HF***

Emilie Dubois-Deruy, PhD<sup>a</sup>, Marie Cuvelliez, MSC<sup>a</sup>, Jan Fiedler, PhD<sup>b</sup>, Henri Charrier, MSC<sup>a</sup>, Paul Mulder, PhD<sup>c</sup>, Eleonore Hebbar, MD<sup>a</sup>, Angelika Pfanne<sup>b</sup>, Olivia Beseme, MSC<sup>a</sup>, Maggy Chwastyniak, MSC<sup>a</sup>, Philippe Amouyel, MD PhD<sup>a,d</sup>, Vincent Richard, PhD<sup>c</sup>, Christophe Bauters, MD<sup>a,d</sup>, Thomas Thum, MD PhD<sup>b</sup>, and Florence Pinet, PhD<sup>a,\*</sup>.

<sup>a</sup>INSERM, U1167, FHU-REMOD-HF, Institut Pasteur de Lille, University Lille Nord de France, 59800 Lille, France

<sup>b</sup>Institute of Molecular and Translational Therapeutic Strategies (IMTTS), IFB-Tx, Hannover Medical School, Hannover, Germany

<sup>c</sup>Normandie Univ, UNIROUEN, Inserm U1096, FHU-REMOD-HF, 76000 Rouen, France

<sup>d</sup>Centre Hospitalier Régional et Universitaire de Lille, 59800 Lille, France

\*Corresponding author:

Dr Florence PINET, INSERM U1167-IPL, 1 rue du professeur Calmette, 59019 Lille cedex, France

Tel: (33) 3 20 87 72 15

Fax: (33) 3 20 87 78 94

E-mail: [florence.pinet@pasteur-lille.fr](mailto:florence.pinet@pasteur-lille.fr)

## **Detailed Material and methods**

All methods were carried out in accordance with relevant guidelines and regulations and all experimental protocols were approved by Inserm.

### **Animal models**

All animal experiments were performed according to the Guide for the Care and Use of Laboratory Animals published by the US National Institutes of Health (NIH publication NO1-OD-4-2-139, revised in 2011). Animals were used and experimental protocols performed under the supervision of a person authorized to perform experiments on live animals (F. Pinet: 59-350126 and E. Dubois-Deruy: 59-350253). Approval was granted by the institutional ethics review board (CEEA Nord Pas-de-Calais N°242011, January 2012).

Before surgery, rats were anaesthetized (sodium methohexital, 50 mg/kg IP), while analgesia was administered before (xylazine 5 mg/kg IP) and 1h after surgery (xylazine 50 mg/kg subcutaneously) as described<sup>1</sup>. MI was induced in 10-week-old male Wistar rats (n=63) (Janvier, Le Genest St isle, France) by ligation of the left anterior descending coronary artery<sup>1,2</sup>. Haemodynamic and echocardiographic measurements (Supplementary Table 1) were taken 7 days and 2 months after surgery, followed by heart excision and plasma sampling, as previously described<sup>3,4</sup>. Blood samples were collected in EDTA-treated tubes and then centrifuged for 15 min at 3000 rpm to remove cells and platelets. After centrifugation, the plasma was collected, aliquoted and stored at -80°C.

### **Human samples**

REVE-2 was a multicenter study that enrolled 246 patients with anterior wall Q-wave MI from 8 centers in France from February 2006 to September 2008<sup>5</sup>. Inclusion criteria were hospitalization within 24 hours after symptom onset and at least 3 LV segments of the infarct zone that were akinetic at predischarge echocardiography. Exclusion criteria were inadequate

echographic image quality, life-limiting noncardiac disease, significant valvular disease, or previous Q-wave MI. The research protocol was approved by the ethics committee of the Centre Hospitalier et Universitaire de Lille (CP05/91 of December 13<sup>th</sup> 2005, Lille, France), and written informed consent was obtained from each patient. All experiments were performed in accordance with relevant guidelines and regulations. The protocol required serial echographic studies at hospital discharge (day 3 to day 7) and 3 months and 1 year after MI; serial blood sampling was performed at hospital discharge (day 3 to day 7) and 1 month, 3 months, and 1 year after MI. Plasma were processed within 2 hours, and samples were divided into aliquots and stored at  $-80^{\circ}\text{C}$ . Baseline characteristics of REVE-2 population are summarized in Table 1.

## **Cell Culture**

### *H9c2 cell line*

The rat embryonic-heart derived H9c2 cell line (ATCC, CRL-1446) were seeded at a density  $1 \times 10^5$  cells/well in 6-well plates at  $37^{\circ}\text{C}$  and 5%  $\text{CO}_2$  in Dulbecco's Modified Eagle Medium (Life technologies) supplemented with 10% (v/v) Fetal Bovine Serum (ATCC), 1% penicillin and streptomycin (10,000 U/mL). Cells were then treated with Iso (10  $\mu\text{M}$ ) in a DMEM, 1% penicillin and streptomycin without serum for 24h and 48h.

### *Cytivia Plus Cardiomyocytes*

The human embryonic-heart derived Cytivia Plus Cardiomyocytes (GE Healthcare, 29-0918-80) were seeded at a density  $2 \times 10^5$  cells/well in 6-well plates coated with Matrigel 1:30 in RPMI (Life technologies) supplemented with 2% (v/v) B27 supplement (Life technologies) for 7 days at  $37^{\circ}\text{C}$  under 5%  $\text{CO}_2$  atmosphere.

## **Proteomic and phosphoproteomic analysis**

Proteomic and phosphoproteomic analysis were performed as already described<sup>3,6</sup>. Briefly, LV proteins (100-500 µg) from sham- and 2 months MI-rats were analyzed by 2D-electrophoresis and specific staining. Detailed protocols as already been published<sup>3,6</sup>.

### **Bioinformatical analysis**

Differentially regulated proteins previously identified by mass spectrometry<sup>3,6</sup> were further analyzed using Ingenuity Pathway Analysis (IPA, [www.ingenuity.com](http://www.ingenuity.com), Winter Release 2012, Ingenuity Systems, Mountain View, CA). A protein interaction network was generated as follows: a dataset containing the up- and downregulated proteins, called focus proteins, was uploaded into the IPA tool (Supplementary Table 2). These focus proteins were overlaid onto a global molecular network developed from the information in the Ingenuity Pathways Knowledge Base. Networks of these focus proteins were then algorithmically generated by including as many focus proteins as possible and other nonfocus proteins from the database that are needed to generate the network based on connectivity. Here, we focused our analysis on microRNAs with high predicted and experimentally observed selection.

### **RNA Extraction and qRT-PCR Analyses**

#### *Rat LV samples*

RNA was extracted from LV (about 60 mg) and homogenized with 2mL TRI Reagent® (Sigma-Aldrich) in Ultra-Turrax®. To ensure complete dissociation of nucleoprotein complexes, samples were kept 5 min at room temperature before addition of 200 µL of chloroform per ml of TRI Reagent. Samples were then shaken vigorously for 15 sec before centrifugation at 12,000 g for 12 min at 4°C to recuperate RNA in the upper aqueous phase. This phase was transferred to a fresh tube and same volume of 2-propanol was added for 2h at -20°C before centrifugation at 13,000 g for 30 min at 4°C. The RNA pellet was washed by

adding 800 $\mu$ L of ethanol before centrifugation at 12,000 g for 10 min at 4°C. Samples were dried and then solubilised in 40 $\mu$ L of RNase-free water and store at -80°C.

#### *Rat and Human plasma samples*

RNA was extracted from 50 $\mu$ L of plasma with miRNeasy Minikit (Qiagen, #217004), as previously described<sup>7</sup>. As an internal spiked-in control, *Coenorhabditis elegans* miR-39 (Cel-39-1) was added during the isolation process. Samples were dried and then solubilised in 10  $\mu$ L of RNase-free water and store at -80°C.

#### *Cell samples*

RNA was extracted from H9c2 and Cytivia 6-wells plate with miRNeasy Minikit (Qiagen, #217004). For Cytivia, Matrigel was previously digested by Corning Cell Recovery Solution (#354253) according to the manufacturer's instructions.

#### *RT-qPCR analyses*

Quality of LV RNA extraction was checked with Pico600 RNA (Agilent) to determine the RNA Integrity Number (RIN). Reverse-transcription was performed with 100 ng of rat LV and plasma total RNA using the miScript II RT kit (Qiagen) and the cDNA was amplified with QuantiTect® SYBR® Green PCR kit (Qiagen) for micro-RNAs and miScript SYBR Green PCR (Qiagen) for mRNA on a Mx3000P Q-PCR system (Agilent Technologies), according to the manufacturer's instructions.

The human plasma RNA was reverse transcribed with TaqMan MicroRNA Reverse Transcription Kit (Applied Biosystems, #4366597) and specific miRNA Reverse Transcription Primers (Applied Biosystems, #4427975) for miR-21-5p, miR-23a-3p and miR-222-3p and Cel-39-1 as normalization control and RT-PCR analysis was performed using iQSupermix (Biorad, #170-8864) and specific miRNA Taqman Probes (Applied Biosystems, #4427975) using an automatic robotic pipetting device (Agilent).

**Protein extraction**

Proteins were extracted from 40 mg of LV frozen tissue with Dounce-Potter homogenization or from 6-well plates cell into ice-cold RIPA buffer (50 mmol/L Tris [pH7.4], 150 mmol/L NaCl, 1% Igepal CA-630, 50 mmol/L deoxycholate, and 0.1% SDS) containing anti-proteases (Complete™ EDTA-free, Roche Diagnostics), serine/threonine protein phosphatase inhibitors (Phosphatase inhibitor Cocktail 3, Sigma-Aldrich) and 1 mmol/L Na<sub>3</sub>VO<sub>4</sub>, as described previously<sup>3</sup>. Lysed cells were incubated for 1h at 4°C, centrifuged 15 min at 12 000 rpm to collect the soluble proteins. Protein concentrations were determined with a Lowry-based method protein assay (Biorad, Marnes-la-Coquette, France) and samples were kept at -80°C.

**Western blot**

Soluble proteins (5-15 µg) were resolved on 15% SDS-PAGE and transferred on 0.2 µm nitrocellulose membranes (Trans-Blot® Turbo™ Transfert Pack, Bio-Rad). Equal total proteins loads were confirmed by Ponceau red (0.1% Ponceau , Sigma-Aldrich), 5% acetic acid (v/v)] staining of the membranes. The membranes were then blocked in 5% milk in TBS-Tween buffer for 1h before 4°C overnight incubation with SOD2 antibody (Abcam ab16956) or GAPDH (Santa-Cruz, sc-365062, diluted 1/10000 in 5% milk TBS-Tween buffer. Blots were then washed three times with TBS-Tween 0.1% buffer and incubated with mouse horseradish peroxidase-labelled secondary antibodies for 1h (1/10000) in blocking solution. The Chemidoc® camera (Biorad) was used for imaging and densitometry analysis after membranes were incubated with enhanced chemiluminescence (ECL™) western blotting detection reagents (GE Healthcare).

**SOD2 ELISA Kit**

SOD2 was quantified from 100 $\mu$ L of plasma diluted 1/50 with Human SOD2 ELISA Kit (Abnova), according to the manufacturer's instructions. SOD2 concentration was determined by average the duplicate readings for each standard, control, and samples and subtract the average zero standard optical density.

### **Immunofluorescence**

Biphotonic confocal microscopy was used for the imaging of 4% paraformaldehyde and 0.1% Triton fixed/permeabilized cardiomyocytes. Immunofluorescence staining was performed by saturation for 30 min with 1% BSA before incubation with the alpha-actinin antibody (sc-7453, Santa-Cruz) overnight at 4°C at dilution 1/50. Alexa Fluor® 568 coupled anti-goat secondary antibody at dilution 1/500 was incubated for 30 min at room temperature before nuclei staining for 10 min at room temperature (Hoechst 33258, Invitrogen™) with mounting medium (H-1500, Vectashield).

Mitochondrial superoxide anion levels were measured using MitoSOX Red (DHE conjugated to a mitochondrial localization tag). Cardiomyocytes were incubated in HBSS with 10  $\mu$ M MitoSOX Red (Life Technologies) for 20 min at 37°C.

Stainings were visualized with a x40 objective on an LSM710 confocal microscope that used Zen image acquisition and analysis software (Zeiss). Images were acquired with a resolution of at least 1024 $\times$ 1024.

### **Luciferase Reporter Assay**

Human SOD2 3'UTR (824 bp) harboring three potential binding sites for miR-222-3p was cloned into Spe I and Hind III cloning site of pMIR-REPORT vector (Ambion). The resulting construct (20 ng) was co-transfected with control mirVana mimic or mirVana mimic miR-222-3p (each 30nM, ThermoFisher Scientific) and 20 ng of  $\beta$ -galactosidase control plasmid (Promega) into 48 well-plated HEK293 reporter cells by the use of Lipofectamine 2000

(Invitrogen). Cells were incubated for 24h before detecting luciferase and  $\beta$ -galactosidase activity applying different substrates (Promega).

### **Transfection**

#### *SOD2 siRNA*

The specific siRNA specifically targeting rat SOD2 mRNA (SOD2 siRNA) and non-targeting control (NT siRNA) were used (ON-TARGETplus Rat Sod2 (24787) siRNA - SMARTpool, #L-080048-02-0010, Dharmacon, GE Healthcare). H9c2 were plated (300,000 cells/well) in 6-well plates and were allowed to grow for 24h without antibiotics. SOD2 or NT siRNA (25 nmol/L) were transfected with the DharmaFECT® reagent (4  $\mu$ L) according to the manufacturer's recommendations. Total cell extracts were collected 72h after transfection.

#### *MiR-222-3p modulation*

The specific miR-222 mimic and miR-222 inhibitor and negative control were used (miRVana, Life Technologies). Cytivia Plus cardiomyocytes were plated (200,000 cells/well) in 6-well plates and were allowed to grow for 1 week in RPMI supplemented with 2% (v/v) B27. miR-222 mimic, miR-222 inhibitor and their negative control (100 nmol/L) were transfected with the Lipofectamine 2000 (Life Technologies) reagent (4  $\mu$ L) in OptiMEM (Life Technologies). Medium was changed for RPMI supplemented with 2% (v/v) B27 6h after transfection. Cells were treated with Iso 10  $\mu$ M 24h after transfection. Total cell extracts were collected 72h after transfection.

### **Molecular data processing**

The molecular REVE-2 network model was built based on the molecular data as described<sup>8</sup>, including 24 molecular variables (18 proteins, 6 non-coding RNAs (5 miRNAs and 1 long noncodingRNA), measured at 1 to 4 time points (depending on the variables, including baseline, 1 month, 3 months, and 1 year). To build the REVE-2 network model, the



knowledge platform EdgeBox (EdgeLeap's proprietary knowledge platform) was used as a resource of public knowledge on molecular interactions. The REVE-2 network model embeds the REVE-2 molecular variables in an integrated network of known interactions ("edges") between molecules ("nodes"). All visualizations of the REVE-2 network model were performed using Cytoscape, version 3.4.0.

For each node in the network the centrality measure "betweenness" was calculated using the igraph R package. The betweenness of a node is the normalized count of shortest paths between all other nodes in the network passing through that node. High betweenness of a node indicates that a molecule is crucial to maintain functionality and coherence of signaling mechanisms, while a low betweenness indicates a more peripheral role for the molecule.

### **Statistical analysis**

For cell culture and animal model, data are expressed as means  $\pm$  SEM and analysed with GraphPad software. Data were compared using nonparametric Mann–Whitney test for 2 groups' comparison and using Kruskal-Wallis with Dunn's multiple comparison test for multiple groups' comparison. Statistical significance was accepted at the level of  $P < 0.05$ .

For Human studies, the levels of miRs and SOD2 were log-transformed and compared between high remodelers (>20% change in LVEDV between baseline and 1 year) and non remodelers (<20% change in LVEDV between baseline and 1 year). We used a logistic regression adjusted for age, sex, and baseline LVEDV. All statistical analyses were performed using the STATA 14.1 software (STATA Corporation, College Station, Texas, USA). For analyzing correlation between the circulating levels of SOD2 and miRNAs, we used the Pearson correlation coefficient test. Statistical significance was assumed at a p value  $< 0.05$ .

## References

1. Mulder, P. *et al.* Early versus delayed angiotensin-converting enzyme inhibition in experimental chronic heart failure. Effects on survival, hemodynamics, and cardiovascular remodeling. *Circulation* **95**, 1314–1319 (1997).
2. Pfeffer, M. A, Pfeffer, J. M., Steinberg, C. & Finn, P. Survival after an experimental myocardial infarction: beneficial effects of long-term therapy with captopril. *Circulation* **72**, 406–412 (1985).
3. Dubois, E. *et al.* Decreased Serine207 phosphorylation of troponin T as a biomarker for left ventricular remodelling after myocardial infarction. *Eur. Heart J.* **32**, 115–123 (2011).
4. Mulder, P. *et al.* Long-term heart rate reduction induced by the selective I(f) current inhibitor ivabradine improves left ventricular function and intrinsic myocardial structure in congestive heart failure. *Circulation* **109**, 1674–1679 (2004).
5. Fertin, M. *et al.* Usefulness of serial assessment of B-type natriuretic peptide, troponin I, and C-reactive protein to predict left ventricular remodeling after acute myocardial infarction (from the REVE-2 Study). *Am. J. Cardiol.* **106**, 1410–1416 (2010).
6. Cieniewski-Bernard, C. *et al.* Proteomic Analysis of Left Ventricular Remodeling in an Experimental Model of Heart Failure. *J. Proteome Res.* **7**, 5004–5016 (2008).
7. Bauters, C. *et al.* Circulating miR-133a and miR-423-5p fail as biomarkers for left ventricular remodeling after myocardial infarction. *Int. J. Cardiol.* **168**, 1837–1840 (2013).
8. Pinet, F. *et al.* Integrative network analysis reveals time-dependent molecular events underlying left ventricular remodeling in post-myocardial infarction patients. *BBA-Mol Bas Dis* **1862**, 1445-1453 (2017).

## Supplementary Figures

### Supplementary Figure 1: MiRNAs expression in LV of HF-rats.

(A) Graphical representation of network built from the proteomic data analyzed with IPA focused on SOD2 protein. The full IPA network is described as Supplementary Table 2. Continuous full arrow indicates direct interaction and dotted arrows non-direct interaction. Quantification by RT-qPCR of miR-145-5p (A, middle panel), miR-21-3p (A, right panel), miR-29b-3p (B), miR-338-3p (C), miR-133a (D), miR-483-3p (E), miR-320a (F) and miR-377-5p (G) in RNA extracted from LV of sham- and HF-rats after 7 days (circle) and 2 months (square) after MI. Data were normalized to miR-423-3p and graph shows mean  $\pm$  SEM values expressed as fold change ( $2^{-\Delta\Delta C_t}$ ). The protein identified for the interaction with miRNAs by IPA analysis is indicated for each miRNAs. \*\*  $p < 0.01$  from at least 6 LV samples for 2 groups' comparison (nonparametric Mann–Whitney test) and ####  $p < 0.001$ , and for multiple groups' comparison (Kruskall-Wallis with Dunn's multiple comparison test).

### Supplementary Figure 2: Detailed molecular network of miR-222-3p.

Visualization of the REVE-2 molecular network model centralized on the molecules (nodes) interacting with miR-222-3p at baseline (top) and 3 months (bottom) post-MI. MiR-222-3p is circled in red, nodes are colored by cluster membership, based on the 12 clusters that contain REVE-2 variables<sup>8</sup>. Detailed information of the REVE-2 network is provided as Supplementary Table 3.

### Supplementary Figure 3: Circulating SOD2 and miRNAs plasma levels of REVE-2 patients.

REVE-2 patients (n=224) were divided as no remodelers (LVR < 20%, n=138) (white) and high remodelers (LVR > 20%, n=86) (grey) according to the LV remodeling determined as  $((EDV_{1\text{year}} - EDV_{\text{baseline}}) / EDV_{\text{baseline}})$ . (A) Quantification by RT-qPCR of miR-21-5p in

plasma extracted from REVE-2 patients at baseline and after 3 months and 1 year post-MI for all the population (left panel). Analysis were also performed by separating women (n=46, 24 no LVR and 20 high LVR) and men (n=200, 114 with no LVR and 66 with LVR) (right panel). Data were expressed as log (miR/cel39) and represented in box plot with the central rectangle for the interquartile range, the segment inside the rectangle for the median and the segment outside for the minimum and maximum (top panels). Pearson correlation analysis between SOD2 and miR-21-5p in plasma levels of REVE-2 patients at 3 month post-MI (bottom panels). \*, p<0.05 compared to no LVR. The scatter plots show the correlation between SOD2 and miR-222-3p plasma levels of REVE-2 patients at 3 month post-MI for all REVE-2 population (n=246) (left panel) and for men (n=200) (right panel). **(B)** Quantification by RT-qPCR of miR-23a-3p ) in plasma extracted from REVE-2 patients at baseline and after 3 months and 1 year post-MI. REVE-2 patients were divided as no remodelers (LVR < 20%) (white) and high remodelers (LVR > 20%) (grey) according to the LV remodeling determined as  $((EDV_{1year} - EDV_{baseline}) / EDV_{baseline})$ . for all the population (left panel). Analysis were also performed by separating women (n=46, 24 no LVR and 20 high LVR) and men (n=200, 114 with no LVR and 66 with LVR) (right panel). Data were expressed as log (miR/cel39) and represented in box plot with the central rectangle for the interquartile range, the segment inside the rectangle for the median and the segment outside for the minimum and maximum (top panels). \*, p<0.05 compared to no LVR. Pearson correlation analysis between SOD2 and miR-23a-3p in plasma levels of REVE-2 patients at 3 month and 1 year post-MI (bottom panels). The scatter plots show the correlation between SOD2 and miR-222-3p plasma levels of REVE-2 patients at 3 month and 1 year post-MI for all REVE-2 population (n=246) (left panels) and for men (n=200) (right panels).

**Supplementary Table 1: Echocardiographic, hemodynamic and morphometric parameters in sham and HF-rats.**

| Parameters                                                     | 7 days        |              | 2 months       |                |
|----------------------------------------------------------------|---------------|--------------|----------------|----------------|
|                                                                | sham<br>(n=8) | HF<br>(n=7)  | sham<br>(n=25) | HF<br>(n=23)   |
| LVEDD, mm                                                      |               |              | 6.7 ± 0.1      | 10.3 ± 0.3***  |
| LVESD, mm                                                      |               |              | 3.5 ± 0.1      | 8.7 ± 0.3***   |
| LVEDP, mmHg                                                    |               |              | 1.72 ± 0.41    | 6.15 ± 1.5**   |
| LVESP, mmHg                                                    |               |              | 126 ± 5        | 123 ± 3        |
| dP/dt <sub>max</sub> , 10 <sup>-3</sup> mmHg.sec <sup>-1</sup> |               |              | 9.9 ± 0.4      | 7.9 ± 0.4**    |
| dP/dt <sub>min</sub> , 10 <sup>-3</sup> mmHg.sec <sup>-1</sup> |               |              | 9.5 ± 0.6      | 6.6 ± 0.5**    |
| FS, %                                                          |               |              | 48 ± 2         | 17 ± 2***      |
| SV, mL.beat <sup>-1</sup>                                      |               |              | 0.35 ± 0.01    | 0.31 ± 0.01*   |
| CO, mL.min <sup>-1</sup>                                       |               |              | 147 ± 7        | 123 ± 7*       |
| DPB, mmHg                                                      |               |              | 105 ± 5        | 95 ± 6         |
| BW, g                                                          | 319 ± 14      | 311 ± 7      | 460 ± 6        | 459 ± 9        |
| HW, g                                                          | 0.97 ± 0.02   | 1.08 ± 0.03* | 1.23 ± 0.03    | 1.58 ± 0.07*** |
| HW/BW, mg/g                                                    | 3.09 ± 0.19   | 3.48 ± 0.17  | 2.69 ± 0.07    | 3.46 ± 0.16*** |
| RVW, mg                                                        | 198 ± 8       | 213 ± 24     | 210 ± 9        | 279 ± 23**     |
| LVW, g                                                         | 0.7 ± 0.02    | 0.72 ± 0.01  | 0.92 ± 0.02    | 1.14 ± 0.05*** |
| AW, mg                                                         | 66 ± 6.3      | 143 ± 25.8** | 97 ± 8.4       | 161 ± 18.9**   |
| LW, g                                                          | 0.93 ± 0.03   | 1.17 ± 0.09* | 1.08 ± 0.02    | 1.26 ± 0.12    |

AW, atrial weight; BW, body weight; CO, cardiac output; DPB; diastolic blood pressure; dP/dt<sub>max</sub>, cardiac contractility; dP/dt<sub>min</sub>, cardiac relaxation; FS, fractional shortening; HW, heart weight; LVEDD, left ventricle end diastolic diameter; LVEDP, left ventricle end diastolic pressure; LVESD; left ventricle end systolic diameter; LVESP, left ventricle end systolic pressure; LVW, left ventricle weight; LW, lung weight, RVW, right ventricle weight; SV, stroke volume. \*, p<0.05; \*\* p<0.01; \*\*\* p<0.001 compared to sham.

**Supplementary Table 2: Detailed proteins differentially expressed or phosphorylated in LV of HF-rats overlaid onto a global molecular network in the IPA Knowledge Base.**

| Accession number                                                                                   | Protein name                                                | Fold-change (HF vs sham) |                 | IPA              |                       |
|----------------------------------------------------------------------------------------------------|-------------------------------------------------------------|--------------------------|-----------------|------------------|-----------------------|
|                                                                                                    |                                                             | Expression               | Phosphorylation | miRNA identified | predicted interaction |
| <b>2-oxoglutarate metabolic process (GO:0006103)</b>                                               |                                                             |                          |                 |                  |                       |
| Q6P6R2                                                                                             | Dihydrolipoyl dehydrogenase, mitochondrial                  | x 2.2                    | ND              |                  |                       |
| Q99NA5                                                                                             | Isocitrate dehydrogenase [NAD] subunit alpha, mitochondrial | x 0.62                   | Induced         |                  |                       |
| <b>Actin crosslink formation (GO:0051764)</b>                                                      |                                                             |                          |                 |                  |                       |
| P50753                                                                                             | Troponin T, cardiac muscle                                  | ND                       | / 4.3           |                  |                       |
| <b>Actin filament capping (GO:0051693)</b>                                                         |                                                             |                          |                 |                  |                       |
| P04692                                                                                             | Tropomyosin alpha-1 chain                                   | ND                       | / 5.5           | miR-29b-3p       | Direct                |
|                                                                                                    |                                                             |                          |                 | miR-338-3p       | Direct                |
| <b>Activation of signaling protein activity involved in unfolded protein response (GO:0006987)</b> |                                                             |                          |                 |                  |                       |
| P06761                                                                                             | 78 kDa glucose-regulated protein                            | ND                       | Suppressed      |                  |                       |
| <b>Acute-phase response (GO:0006953)</b>                                                           |                                                             |                          |                 |                  |                       |
| P01048                                                                                             | T-kininogen 1                                               | x 3                      | ND              |                  |                       |
| <b>Acyl-CoA metabolic process (GO:0006637)</b>                                                     |                                                             |                          |                 |                  |                       |
| O55171                                                                                             | Acyl-coenzyme A thioesterase 2, mitochondrial               | x 0.62                   | Induced         |                  |                       |
| <b>Aerobic respiration (GO:0009060)</b>                                                            |                                                             |                          |                 |                  |                       |
| Q68FY0                                                                                             | Cytochrome b-c1 complex subunit 1, mitochondrial            | ND                       | Suppressed      |                  |                       |
| <b>Age-dependent response to reactive oxygen species (GO:0001315)</b>                              |                                                             |                          |                 |                  |                       |
| P07895                                                                                             | Superoxide dismutase [Mn], mitochondrial (SOD2)             | x 2.1                    | ND              | miR-21-3p        | Indirect              |
|                                                                                                    |                                                             |                          |                 | miR-21-5p        | Indirect              |
|                                                                                                    |                                                             |                          |                 | miR-23a-3p       | Indirect              |
|                                                                                                    |                                                             |                          |                 | miR-145-5p       | Indirect              |
|                                                                                                    |                                                             |                          |                 | miR-222-3p       | Direct                |
| <b>Aging (GO:0007568)</b>                                                                          |                                                             |                          |                 |                  |                       |
| P23928                                                                                             | Alpha-crystallin B chain                                    | x 6.2                    | / 4.7           |                  |                       |
| P15429                                                                                             | Beta-enolase                                                | ND                       | Suppressed      |                  |                       |
| P04041                                                                                             | Glutathione peroxidase 1                                    | no                       | / 4.6           |                  |                       |
| P63018                                                                                             | Heat shock cognate 71 kDa protein                           | ND                       | x 6.2           |                  |                       |
| <b>Animal organ regeneration (GO:0031100)</b>                                                      |                                                             |                          |                 |                  |                       |
| P67779                                                                                             | Prohibitin                                                  | ND                       | Suppressed      |                  |                       |
| P11980                                                                                             | Pyruvate kinase PKM                                         | ND                       | Induced         | miR-133a         | Indirect              |

|                                                      |                                                                     |        |            |            |          |
|------------------------------------------------------|---------------------------------------------------------------------|--------|------------|------------|----------|
| <b>Apopototic mitochondrial changes (GO:0008637)</b> |                                                                     |        |            |            |          |
| Q66HF1                                               | NADH-ubiquinone oxidoreductase 75 kDa subunit, mitochondrial        | ND     | Suppressed |            |          |
| <b>Apopototic process (GO:0006915)</b>               |                                                                     |        |            |            |          |
| P04797                                               | Glyceraldehyde-3-phosphate dehydrogenase                            | x 1.6  | ND         |            |          |
| <b>ATP metabolic process (GO:0046034)</b>            |                                                                     |        |            |            |          |
| P15999                                               | ATP synthase subunit alpha, mitochondrial                           | x 4.7  | Induced    |            |          |
| P10719                                               | ATP synthase subunit beta, mitochondrial                            | x 2.1  | x 4.9      |            |          |
| P31399                                               | ATP synthase subunit d, mitochondrial                               | x 3.3  | / 1.6      |            |          |
| <b>Carbohydrate metabolic process (GO:0005975)</b>   |                                                                     |        |            |            |          |
| P42123                                               | L-lactate dehydrogenase B chain                                     | ND     | x 5.1      |            |          |
| O88989                                               | Malate dehydrogenase, cytoplasmic                                   | ND     | x 2.9      |            |          |
| P16617                                               | Phosphoglycerate kinase 1                                           | x 0.72 | ND         |            |          |
| P48500                                               | Triosephosphate isomerase                                           | x 2    | ND         |            |          |
| <b>Cardiac muscle contraction (GO:0060048)</b>       |                                                                     |        |            |            |          |
| P16409                                               | Myosin light chain 3                                                | ND     | x 12.2     |            |          |
| P08733                                               | Myosin regulatory light chain 2, ventricular/cardiac muscle isoform | ND     | Suppressed |            |          |
| <b>Cellular response to fatty acid (GO:0071398)</b>  |                                                                     |        |            |            |          |
| P11884                                               | Aldehyde dehydrogenase, mitochondrial                               | ND     | / 2.4      |            |          |
| <b>Cellular response to starvation (GO:0009267)</b>  |                                                                     |        |            |            |          |
| P02770                                               | Serum albumin                                                       | ND     | / 10.5     |            |          |
| <b>Cell redox homeostasis (GO:0045454)</b>           |                                                                     |        |            |            |          |
| P35704                                               | Peroxioredoxin-2                                                    | x 4    | ND         | miR-122-5p | Indirect |
| O35244                                               | Peroxioredoxin-6                                                    | x 1.5  | Induced    | miR-377-5p | Direct   |
| P04785                                               | Protein disulfide-isomerase                                         | x 3    | ND         | miR-210    | Direct   |
|                                                      |                                                                     |        |            | miR-122-5p | Indirect |
| <b>Fatty acid beta-oxidation (GO:0006635)</b>        |                                                                     |        |            |            |          |
| P14604                                               | Enoyl-CoA hydratase, mitochondrial                                  | x 4.7  | ND         |            |          |
| <b>Gluconeogenesis (GO:0006094)</b>                  |                                                                     |        |            |            |          |
| P25113                                               | Phosphoglycerate mutase 1                                           | x 3.7  | ND         | miR-483-3p | Direct   |
| <b>Glycolytic process (GO:0006096)</b>               |                                                                     |        |            |            |          |
| P04764                                               | Alpha-enolase                                                       | ND     | x 4.6      |            |          |

|                                                                                       |                                                     |        |            |          |          |
|---------------------------------------------------------------------------------------|-----------------------------------------------------|--------|------------|----------|----------|
| <b>Hydrogen sulfide biosynthetic process (GO:0070814)</b>                             |                                                     |        |            |          |          |
| P97532                                                                                | 3-mercaptopyruvate sulfurtransferase                | ND     | x 12.8     |          |          |
| <b>Intermediate filament organization (GO:0045109)</b>                                |                                                     |        |            |          |          |
| P48675                                                                                | Desmin                                              | ND     | x 5        |          |          |
| <b>Mesenchyme migration (GO:0090131)</b>                                              |                                                     |        |            |          |          |
| P63269                                                                                | Actin, gamma-enteric smooth muscle                  | ND     | x 19.2     |          |          |
| <b>Mitochondrial electron transport, NADH to ubiquinone (GO:0006120)</b>              |                                                     |        |            |          |          |
| Q68FT1                                                                                | Ubiquinone biosynthesis protein COQ9, mitochondrial | ND     | Suppressed |          |          |
| <b>Phosphocreatine biosynthetic process (GO:0046314)</b>                              |                                                     |        |            |          |          |
| P00564                                                                                | Creatine kinase M-type                              | ND     | Induced    |          |          |
| <b>Proteasome-mediated ubiquitin-dependent protein catabolic process (GO:0043161)</b> |                                                     |        |            |          |          |
| P40112                                                                                | Proteasome subunit beta type-3                      | x 2.7  | ND         |          |          |
| <b>Protein deubiquitination (GO:0016579)</b>                                          |                                                     |        |            |          |          |
| Q91Y78                                                                                | Ubiquitin carboxyl-terminal hydrolase isozyme L3    | x 2.9  | ND         |          |          |
| <b>Regulation of muscle contraction (GO:0006937)</b>                                  |                                                     |        |            |          |          |
| P97541                                                                                | Heat shock protein beta-6                           | x 1.5  | ND         | miR-320a | Indirect |
| <b>Response to heat (GO:0009408)</b>                                                  |                                                     |        |            |          |          |
| O35878                                                                                | Heat shock protein beta-2                           | No     | ND         |          |          |
| Q9QUK5                                                                                | Heat shock protein beta-7                           | x 0.21 | ND         |          |          |
| <b>Serine-type endopeptidase inhibitor activity (GO:0004867)</b>                      |                                                     |        |            |          |          |
| P05545                                                                                | Serine protease inhibitor A3K                       | x 2.2  | x 5.9      |          |          |

Accession number corresponded to Uniprot Knowledge base (UniProtKB, release of April 2014). Proteins were classified by first biological process in Gene Ontology (GO). ND: not detected. IPA: Ingenuity Pathway analysis (Winter release 2012).



**Supplementary Table 3: Detailed list of components of REVE-2 molecular networks centralized on miR-222-3p identified by Cytoscape analysis<sup>8</sup>.**

| Description                                                                                       | Name        | Betweenness   | Degree    | Cluster           |
|---------------------------------------------------------------------------------------------------|-------------|---------------|-----------|-------------------|
| collagen, type V, alpha 2                                                                         | COL5A2      | 0.0144        | 49        | cluster 3         |
| FBJ murine osteosarcoma viral oncogene homolog                                                    | FOS         | 0.013         | 76        | cluster 1         |
| <b>estrogen receptor 1</b>                                                                        | <b>ESR1</b> | <b>0.0096</b> | <b>54</b> | <b>cluster 22</b> |
| tumor protein p53                                                                                 | TP53        | 0.009         | 59        | cluster 19        |
| amyloid beta (A4) precursor protein                                                               | APP         | 0.0088        | 59        | cluster 6         |
| phosphatase and tensin homolog                                                                    | PTEN        | 0.0085        | 27        | cluster 4         |
| matrix metalloproteinase 1 (interstitial collagenase)                                             | MMP1        | 0.0076        | 35        | cluster 9         |
| SWI/SNF related, matrix associated, actin dependent regulator of chromatin, subfamily a, member 4 | SMARCA4     | 0.0054        | 31        | cluster 1         |
| zinc finger and BTB domain containing 7A                                                          | ZBTB7A      | 0.0052        | 30        | no cluster        |
| heat shock protein 90kDa alpha (cytosolic), class A member 1                                      | HSP90AA1    | 0.0045        | 42        | cluster 15        |
| actin, beta                                                                                       | ACTB        | 0.0036        | 42        | cluster 4         |
| v-ets avian erythroblastosis virus E26 oncogene homolog 1                                         | ETS1        | 0.0036        | 32        | cluster 1         |
| intercellular adhesion molecule 1                                                                 | ICAM1       | 0.0034        | 16        | cluster 25        |
| TIMP metalloproteinase inhibitor 3                                                                | TIMP3       | 0.0029        | 6         | cluster 2         |
| actin gamma 1                                                                                     | ACTG1       | 0.0029        | 27        | cluster 4         |
| signal transducer and activator of transcription 5A                                               | STAT5A      | 0.0027        | 36        | cluster 1         |
| pyruvate kinase, muscle                                                                           | PKM         | 0.0027        | 9         | cluster 10        |
| forkhead box O3                                                                                   | FOXO3       | 0.0025        | 23        | cluster 1         |
| host cell factor C1                                                                               | HCFC1       | 0.0023        | 18        | cluster 1         |
| ribosomal protein L12                                                                             | RPL12       | 0.0023        | 42        | cluster 8         |
| eukaryotic translation initiation factor 2, subunit 1 alpha, 35kDa                                | EIF2S1      | 0.0022        | 22        | cluster 8         |
| death-domain associated protein                                                                   | DAXX        | 0.002         | 14        | cluster 14        |
| notchless homolog 1 (Drosophila)                                                                  | NLE1        | 0.0019        | 22        | cluster 1         |
| trinucleotide repeat containing 6B                                                                | TNRC6B      | 0.0018        | 10        | cluster 39        |
| heterogeneous nuclear ribonucleoprotein H1 (H)                                                    | HNRNPH1     | 0.0018        | 16        | cluster 18        |
| talin 1                                                                                           | TLN1        | 0.0016        | 23        | cluster 4         |
| dystroglycan 1 (dystrophin-associated glycoprotein 1)                                             | DAG1        | 0.0016        | 8         | no cluster        |
| splicing factor 3b, subunit 3, 130kDa                                                             | SF3B3       | 0.0015        | 15        | cluster 18        |
| karyopherin (importin) beta 1                                                                     | KPNB1       | 0.0015        | 15        | cluster 33        |
| valosin containing protein                                                                        | VCP         | 0.0014        | 13        | cluster 32        |
| minichromosome maintenance complex component 3                                                    | MCM3        | 0.0014        | 14        | cluster 12        |
| minichromosome maintenance complex component 7                                                    | MCM7        | 0.0014        | 14        | cluster 12        |
| ribosomal protein S2                                                                              | RPS2        | 0.0014        | 32        | cluster 8         |
| interleukin-1 receptor-associated kinase 1                                                        | IRAK1       | 0.0013        | 18        | cluster 21        |
| tumor necrosis factor (ligand) superfamily, member 10                                             | TNFSF10     | 0.0013        | 17        | cluster 14        |
| cyclin-dependent kinase inhibitor 1B (p27, Kip1)                                                  | CDKN1B      | 0.0013        | 24        | cluster 12        |
| protein phosphatase 2, regulatory subunit A, alpha                                                | PPP2R1A     | 0.0013        | 33        | cluster 8         |
| eukaryotic translation initiation factor 3, subunit B                                             | EIF3B       | 0.0012        | 27        | cluster 8         |
| ATPase, class VI, type 11B                                                                        | ATP11B      | 0.0012        | 6         | cluster 10        |
| reversion-inducing-cysteine-rich protein with kazal motifs                                        | RECK        | 0.0011        | 4         | cluster 2         |
| autism susceptibility candidate 2                                                                 | AUTS2       | 0.0011        | 6         | cluster 1         |
| excision repair cross-complementation group 6-like                                                | ERCC6L      | 0.0011        | 14        | cluster 15        |
| filamin A, alpha                                                                                  | FLNA        | 0.0011        | 10        | cluster 4         |
| SEC24 family member C                                                                             | SEC24C      | 0.001         | 8         | no cluster        |
| hes family bHLH transcription factor 1                                                            | HES1        | 0.001         | 7         | cluster 37        |
| KIT ligand                                                                                        | KITLG       | 0.001         | 14        | cluster 4         |
| family with sequence similarity 126, member B                                                     | FAM126B     | 0.001         | 4         | cluster 2         |
| zinc finger, FYVE domain containing 16                                                            | ZFYVE16     | 0.001         | 5         | cluster 28        |
| growth factor receptor-bound protein 10                                                           | GRB10       | 0.0009        | 14        | cluster 4         |
| DEAD (Asp-Glu-Ala-Asp) box helicase 21                                                            | DDX21       | 0.0009        | 8         | cluster 10        |
| proteasome (prosome, macropain) 26S subunit, ATPase, 4                                            | PSMC4       | 0.0009        | 10        | cluster 12        |
| ribosomal protein L8                                                                              | RPL8        | 0.0009        | 30        | cluster 8         |
| high mobility group AT-hook 1                                                                     | HMGA1       | 0.0009        | 14        | cluster 1         |
| cell cycle associated protein 1                                                                   | CAPRIN1     | 0.0009        | 3         | cluster 2         |
| spectrin, beta, non-erythrocytic 2                                                                | SPTBN2      | 0.0008        | 9         | no cluster        |
| coronin, actin binding protein, 1A                                                                | CORO1A      | 0.0008        | 20        | cluster 1         |
| phosphatidylinositol-4-phosphate 5-kinase, type I, alpha                                          | PIP5K1A     | 0.0008        | 11        | cluster 4         |
| pericentrin                                                                                       | PCNT        | 0.0008        | 16        | cluster 15        |
| transmembrane protein 245                                                                         | TMEM245     | 0.0008        | 2         | cluster 5         |
| ezrin                                                                                             | EZR         | 0.0008        | 13        | cluster 14        |
| dicer 1, ribonuclease type III                                                                    | DICER1      | 0.0008        | 9         | cluster 39        |
| vinculin                                                                                          | VCL         | 0.0008        | 16        | cluster 4         |

|                                                                                          |          |        |    |            |
|------------------------------------------------------------------------------------------|----------|--------|----|------------|
| far upstream element (FUSE) binding protein 1                                            | FUBP1    | 0.0008 | 3  | cluster 5  |
| intracisternal A particle-promoted polypeptide                                           | IPP      | 0.0008 | 3  | cluster 12 |
| ALG3, alpha-1,3- mannosyltransferase                                                     | ALG3     | 0.0008 | 9  | cluster 1  |
| dedicator of cytokinesis 5                                                               | DOCK5    | 0.0008 | 3  | cluster 12 |
| v-kit Hardy-Zuckerman 4 feline sarcoma viral oncogene homolog                            | KIT      | 0.0007 | 16 | cluster 4  |
| transmembrane emp24 protein transport domain containing 7                                | TMED7    | 0.0007 | 12 | cluster 14 |
| nucleolar and coiled-body phosphoprotein 1                                               | NOLC1    | 0.0007 | 5  | no cluster |
| enolase 1, (alpha)                                                                       | ENO1     | 0.0006 | 11 | cluster 1  |
| tyrosine 3-monooxygenase/tryptophan 5-monooxygenase activation protein, gamma            | YWHAG    | 0.0006 | 19 | cluster 15 |
| ubiquitin specific peptidase 15                                                          | USP15    | 0.0006 | 10 | cluster 28 |
| zinc finger protein 460                                                                  | ZNF460   | 0.0006 | 14 | cluster 1  |
| kinesin family member 4A                                                                 | KIF4A    | 0.0006 | 7  | no cluster |
| homeodomain interacting protein kinase 2                                                 | HIPK2    | 0.0006 | 5  | cluster 10 |
| QKI, KH domain containing, RNA binding                                                   | QKI      | 0.0006 | 16 | cluster 1  |
| general transcription factor IIIc, polypeptide 5, 63kDa                                  | GTF3C5   | 0.0006 | 5  | no cluster |
| lectin, galactoside-binding, soluble, 3 binding protein                                  | LGALS3BP | 0.0006 | 3  | no cluster |
| eukaryotic translation elongation factor 2                                               | EEF2     | 0.0005 | 18 | cluster 8  |
| transcription elongation factor B (SIII), polypeptide 2 (18kDa, elongin B)               | TCEB2    | 0.0005 | 6  | no cluster |
| interferon regulatory factor 2 binding protein 2                                         | IRF2BP2  | 0.0005 | 10 | cluster 1  |
| replication factor C (activator 1) 1, 145kDa                                             | RFC1     | 0.0005 | 10 | cluster 32 |
| GDP dissociation inhibitor 1                                                             | GDI1     | 0.0005 | 9  | cluster 29 |
| pellino E3 ubiquitin protein ligase family member 2                                      | PEL12    | 0.0005 | 8  | cluster 21 |
| integrin-linked kinase                                                                   | ILK      | 0.0005 | 10 | cluster 4  |
| centrosomal protein 250kDa                                                               | CEP250   | 0.0005 | 14 | cluster 15 |
| cyclin-dependent kinase inhibitor 1C (p57, Kip2)                                         | CDKN1C   | 0.0005 | 7  | cluster 22 |
| protein phosphatase 2, regulatory subunit B, alpha                                       | PPP2R2A  | 0.0005 | 14 | cluster 8  |
| isoleucyl-tRNA synthetase                                                                | IARS     | 0.0005 | 10 | no cluster |
| ubiquitin specific peptidase 9, X-linked                                                 | USP9X    | 0.0004 | 7  | cluster 1  |
| BCL2 binding component 3                                                                 | BBC3     | 0.0004 | 11 | cluster 19 |
| proline-rich coiled-coil 2A                                                              | PRRC2A   | 0.0004 | 3  | cluster 5  |
| zw 10 kinetochore protein                                                                | ZW10     | 0.0004 | 10 | cluster 15 |
| exosome component 1                                                                      | EXOSC1   | 0.0004 | 7  | cluster 8  |
| ceramide synthase 2                                                                      | CERS2    | 0.0004 | 3  | no cluster |
| Obg-like ATPase 1                                                                        | OLA1     | 0.0004 | 9  | cluster 1  |
| translocase of inner mitochondrial membrane 50 homolog (S. cerevisiae)                   | TIMM50   | 0.0004 | 4  | cluster 30 |
| misshapen-like kinase 1                                                                  | MINK1    | 0.0004 | 8  | cluster 10 |
| acetyl-CoA carboxylase alpha                                                             | ACACA    | 0.0004 | 6  | cluster 10 |
| poly(rC) binding protein 2                                                               | PCBP2    | 0.0004 | 12 | cluster 18 |
| MYC-associated zinc finger protein (purine-binding transcription factor)                 | MAZ      | 0.0004 | 4  | cluster 16 |
| drebrin-like                                                                             | DBNL     | 0.0004 | 5  | cluster 26 |
| GDP dissociation inhibitor 2                                                             | GDI2     | 0.0004 | 9  | cluster 29 |
| transmembrane and ubiquitin-like domain containing 1                                     | TMUB1    | 0.0004 | 4  | no cluster |
| cyclin-dependent kinase 18                                                               | CDK18    | 0.0004 | 5  | cluster 10 |
| topoisomerase (DNA) III alpha                                                            | TOP3A    | 0.0003 | 4  | cluster 32 |
| pantothenate kinase 3                                                                    | PANK3    | 0.0003 | 5  | cluster 10 |
| thioredoxin                                                                              | TXN      | 0.0003 | 7  | cluster 33 |
| chromosome 8 open reading frame 33                                                       | C8orf33  | 0.0003 | 4  | cluster 5  |
| bromodomain PHD finger transcription factor                                              | BPTF     | 0.0003 | 5  | no cluster |
| metastasis associated 1 family, member 2                                                 | MTA2     | 0.0003 | 7  | no cluster |
| testis expressed 10                                                                      | TEX10    | 0.0003 | 8  | cluster 1  |
| low density lipoprotein receptor-related protein 10                                      | LRP10    | 0.0003 | 5  | cluster 19 |
| ubiquitin-like modifier activating enzyme 1                                              | UBA1     | 0.0003 | 7  | cluster 1  |
| ribosomal protein S17                                                                    | RPS17    | 0.0003 | 24 | cluster 8  |
| CASK interacting protein 2                                                               | CASKIN2  | 0.0003 | 6  | no cluster |
| phosphorylated adaptor for RNA export                                                    | PHAX     | 0.0003 | 3  | no cluster |
| heterogeneous nuclear ribonucleoprotein D (AU-rich element RNA binding protein 1, 37kDa) | HNRNPD   | 0.0003 | 12 | cluster 18 |
| PAN2 poly(A) specific ribonuclease subunit                                               | PAN2     | 0.0003 | 5  | cluster 8  |
| malate dehydrogenase 2, NAD (mitochondrial)                                              | MDH2     | 0.0003 | 5  | cluster 35 |
| profilin 1                                                                               | PFN1     | 0.0003 | 8  | cluster 1  |

|                                                                                |             |               |          |                  |
|--------------------------------------------------------------------------------|-------------|---------------|----------|------------------|
| selectin E                                                                     | SELE        | 0.0003        | 5        | cluster 5        |
| zinc finger, FYVE domain containing 9                                          | ZFYVE9      | 0.0003        | 5        | cluster 28       |
| insulin receptor substrate 4                                                   | IRS4        | 0.0003        | 9        | cluster 4        |
| chondrosarcoma associated gene 1                                               | CSAG1       | 0.0003        | 11       | cluster 1        |
| erythrocyte membrane protein band 4.1-like 2                                   | EPB41L2     | 0.0003        | 10       | cluster 1        |
| ATPase, Cu++ transporting, beta polypeptide                                    | ATP7B       | 0.0003        | 5        | cluster 10       |
| importin 5                                                                     | IPO5        | 0.0003        | 5        | cluster 33       |
| cancer susceptibility candidate 3                                              | CASC3       | 0.0003        | 18       | cluster 8        |
| mortality factor 4 like 1                                                      | MORF4L1     | 0.0003        | 8        | no cluster       |
| claudin 23                                                                     | CLDN23      | 0.0002        | 2        | cluster 16       |
| serine/arginine repetitive matrix 2                                            | SRRM2       | 0.0002        | 4        | cluster 5        |
| pre-B-cell leukemia homeobox 2                                                 | PBX2        | 0.0002        | 3        | no cluster       |
| protein phosphatase 6, catalytic subunit                                       | PPP6C       | 0.0002        | 3        | cluster 20       |
| eukaryotic translation initiation factor 3, subunit I                          | EIF3I       | 0.0002        | 19       | cluster 8        |
| HAUS augmin-like complex, subunit 8                                            | HAUS8       | 0.0002        | 4        | cluster 1        |
| parkinson protein 7                                                            | PARK7       | 0.0002        | 3        | cluster 5        |
| microtubule-actin crosslinking factor 1                                        | MACF1       | 0.0002        | 3        | cluster 13       |
| protein phosphatase, Mg2+/Mn2+ dependent, 1H                                   | PPM1H       | 0.0002        | 3        | cluster 20       |
| ataxin 7-like 3                                                                | ATXN7L3     | 0.0002        | 3        | cluster 37       |
| methionyl-tRNA synthetase                                                      | MARS        | 0.0002        | 5        | no cluster       |
| RAN binding protein 10                                                         | RANBP10     | 0.0002        | 5        | cluster 22       |
| mesoderm development candidate 2                                               | MESDC2      | 0.0002        | 3        | cluster 2        |
| exosome component 10                                                           | EXOSC10     | 0.0002        | 4        | cluster 33       |
| non-SMC condensin I complex, subunit D2                                        | NCAPD2      | 0.0002        | 3        | cluster 1        |
| calcium binding tyrosine-(Y)-phosphorylation regulated                         | CABYR       | 0.0002        | 2        | cluster 16       |
| <b>superoxide dismutase 2, mitochondrial</b>                                   | <b>SOD2</b> | <b>0.0002</b> | <b>5</b> | <b>cluster 1</b> |
| SAP30-like                                                                     | SAP30L      | 0.0002        | 3        | no cluster       |
| calpastatin                                                                    | CAST        | 0.0002        | 3        | cluster 16       |
| kinesin family member 3B                                                       | KIF3B       | 0.0002        | 4        | no cluster       |
| synaptic vesicle glycoprotein 2A                                               | SV2A        | 0.0002        | 2        | cluster 16       |
| plexin B2                                                                      | PLXNB2      | 0.0002        | 4        | cluster 1        |
| casein kinase 1, gamma 1                                                       | CSNK1G1     | 0.0002        | 4        | cluster 10       |
| slingshot protein phosphatase 2                                                | SSH2        | 0.0002        | 3        | cluster 20       |
| fatty acid synthase                                                            | FASN        | 0.0002        | 7        | cluster 5        |
| chromobox homolog 2                                                            | CBX2        | 0.0002        | 3        | no cluster       |
| folypolyglutamate synthase                                                     | FPGS        | 0.0002        | 4        | cluster 10       |
| phosphatidylethanolamine binding protein 1                                     | PEBP1       | 0.0002        | 4        | cluster 16       |
| oxysterol binding protein-like 10                                              | OSBPL10     | 0.0002        | 8        | cluster 1        |
| ubiquitin-like with PHD and ring finger domains 2, E3 ubiquitin protein ligase | UHRF2       | 0.0002        | 4        | cluster 13       |
| Sad1 and UNC84 domain containing 2                                             | SUN2        | 0.0002        | 6        | cluster 1        |
| polymerase (DNA directed), delta 2, accessory subunit                          | POLD2       | 0.0002        | 4        | cluster 32       |
| poly(A) binding protein interacting protein 2                                  | PAIP2       | 0.0002        | 3        | no cluster       |
| UbiA prenyltransferase domain containing 1                                     | UBIAD1      | 0.0001        | 2        | no cluster       |
| POM121 transmembrane nucleoporin                                               | POM121      | 0.0001        | 5        | cluster 33       |
| maestro heat-like repeat family member 1                                       | MROH1       | 0.0001        | 2        | cluster 13       |
| adaptor-related protein complex 1, beta 1 subunit                              | AP1B1       | 0.0001        | 3        | no cluster       |
| sortilin 1                                                                     | SORT1       | 0.0001        | 4        | cluster 1        |
| lysine (K)-specific methyltransferase 2D                                       | KMT2D       | 0.0001        | 3        | cluster 5        |
| pyridoxal-dependent decarboxylase domain containing 1                          | PDXDC1      | 0.0001        | 2        | cluster 5        |
| deoxyribose-phosphate aldolase (putative)                                      | DERA        | 0.0001        | 2        | cluster 5        |
| SERTA domain containing 4                                                      | SERTAD4     | 0.0001        | 2        | cluster 5        |
| kinesin family member 5C                                                       | KIF5C       | 0.0001        | 4        | cluster 5        |
| cytoskeleton associated protein 2                                              | CKAP2       | 0.0001        | 2        | cluster 5        |
| LYN proto-oncogene, Src family tyrosine kinase                                 | LYN         | 0.0001        | 3        | cluster 21       |
| YY1 associated protein 1                                                       | YY1AP1      | 0.0001        | 3        | cluster 5        |
| microtubule-associated protein 1B                                              | MAP1B       | 0.0001        | 3        | no cluster       |
| ring finger protein 215                                                        | RNF215      | 0.0001        | 4        | cluster 1        |
| cyclin-dependent kinase-like 5                                                 | CDKL5       | 0.0001        | 3        | cluster 10       |

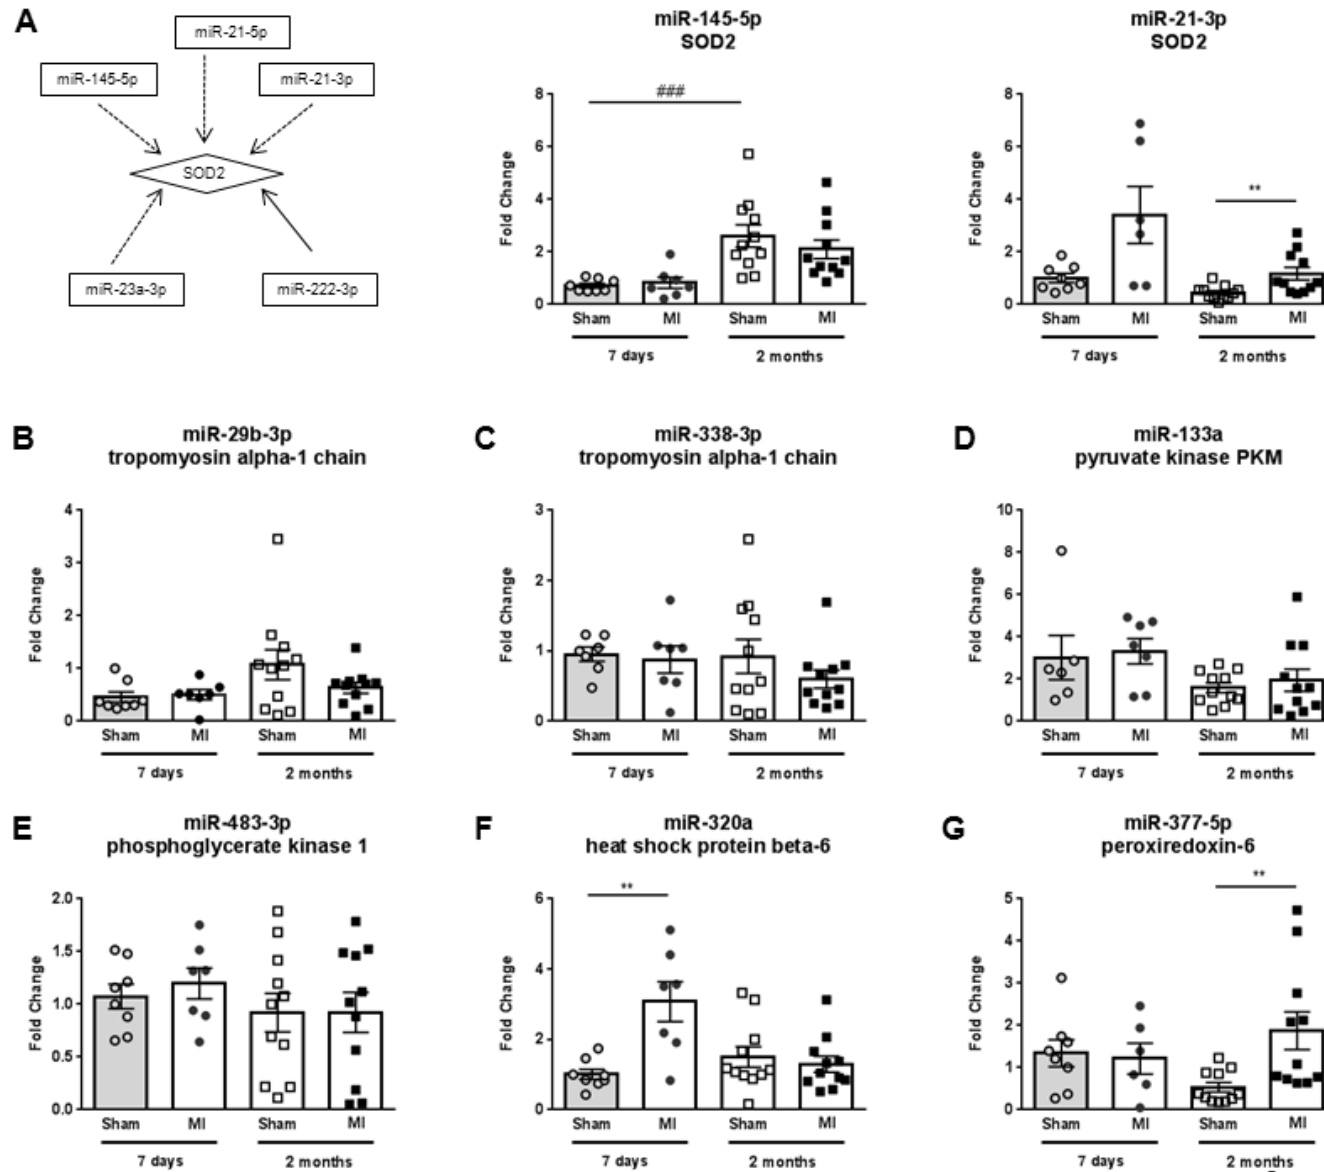

Supplementary Figure 1

Baseline

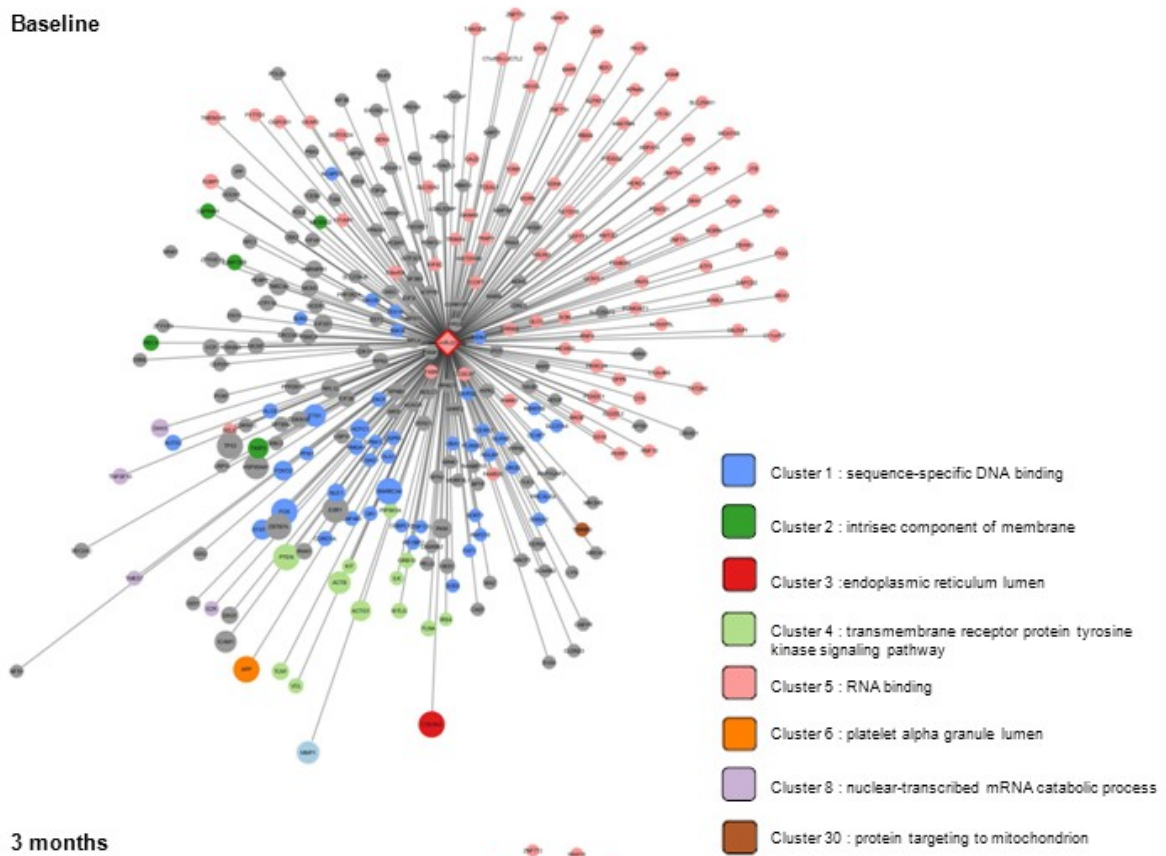

3 months

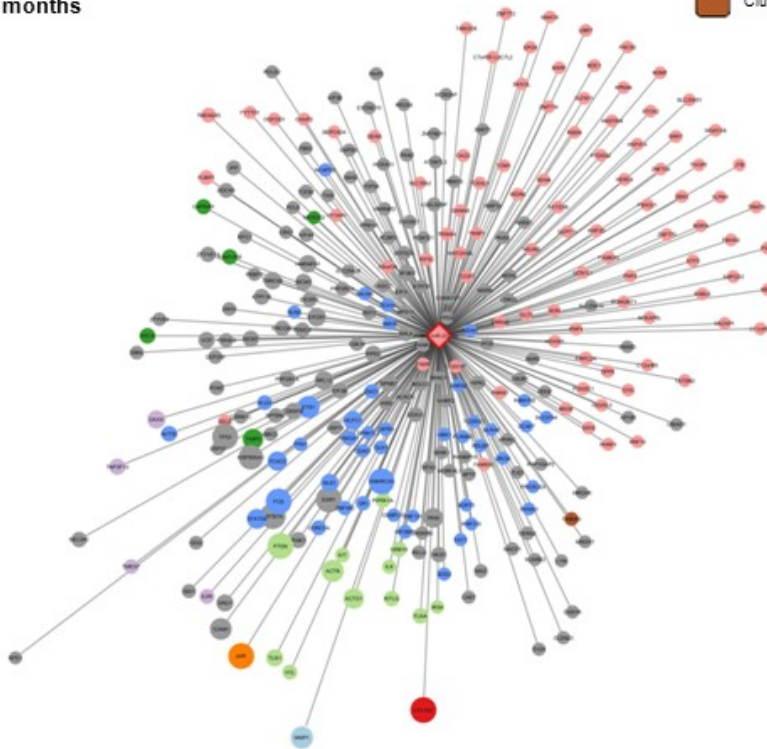

Supplementary Figure 2

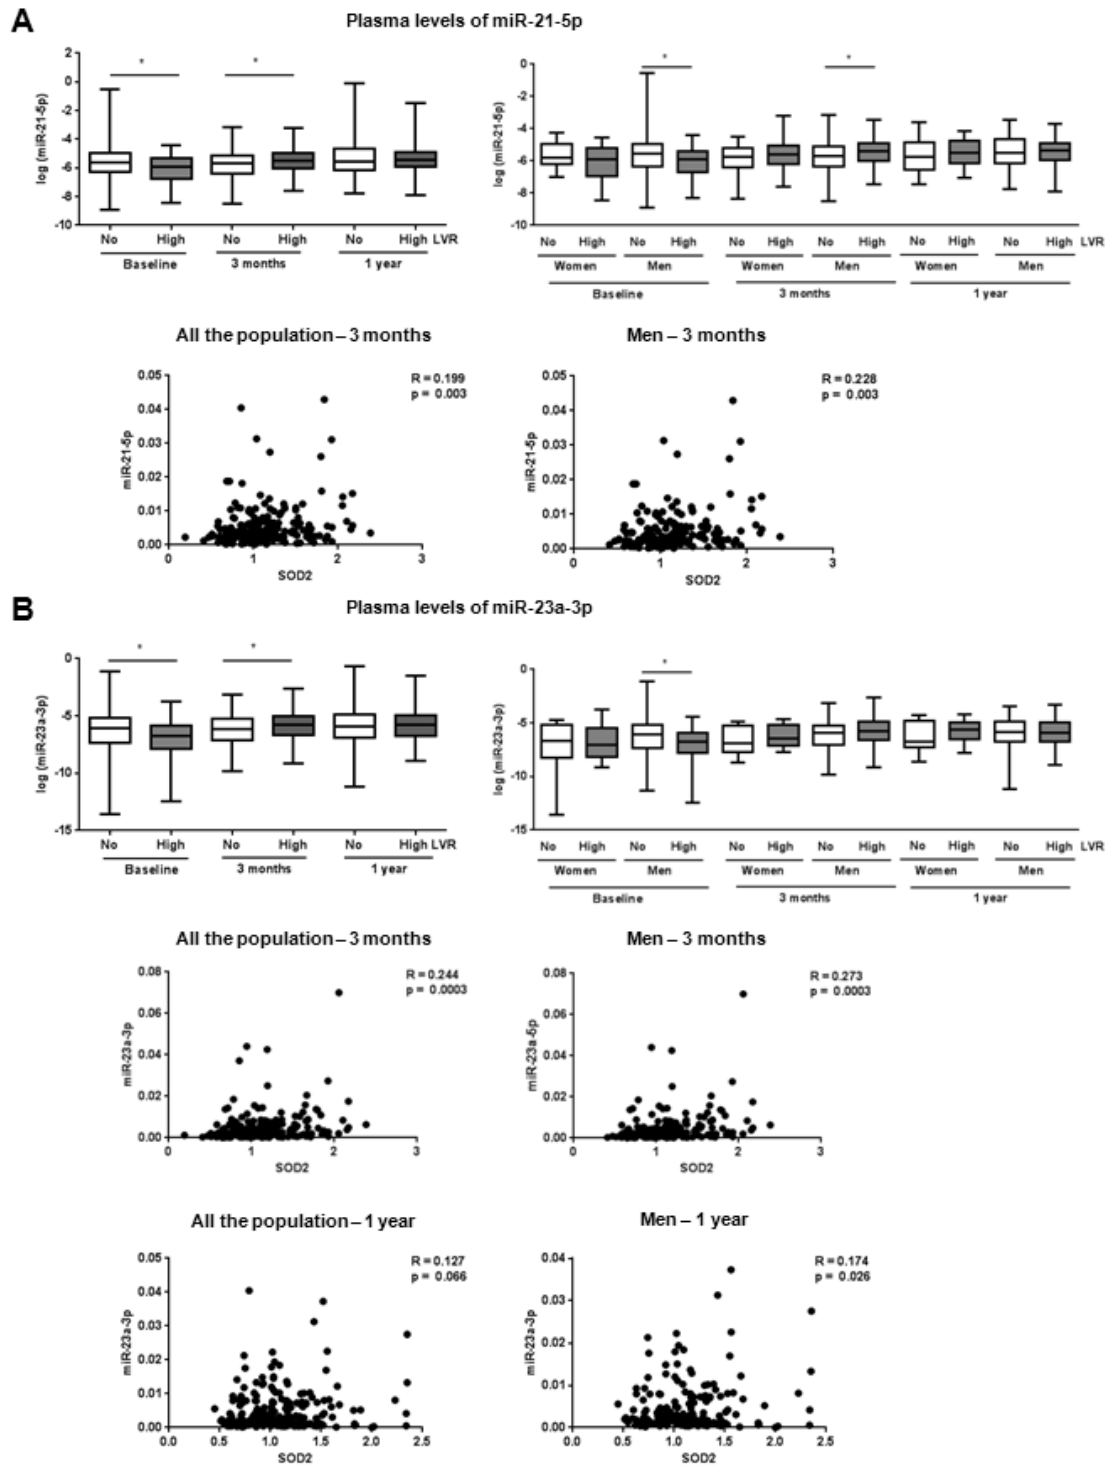

Supplementary Figure 3
